# Supplementary material
Source: MDPI journal article supplement (https://www.mdpi.com/2073-4344/8/12/641)
Supplement: s1 [file s1]

# Supplementary Materials: Highly Selective Photocatalytic Reduction of o-Dinitrobenzene to o-Phenylenediamine over Non-Metal-Doped TiO<sub>2</sub> under Simulated Solar Light Irradiation

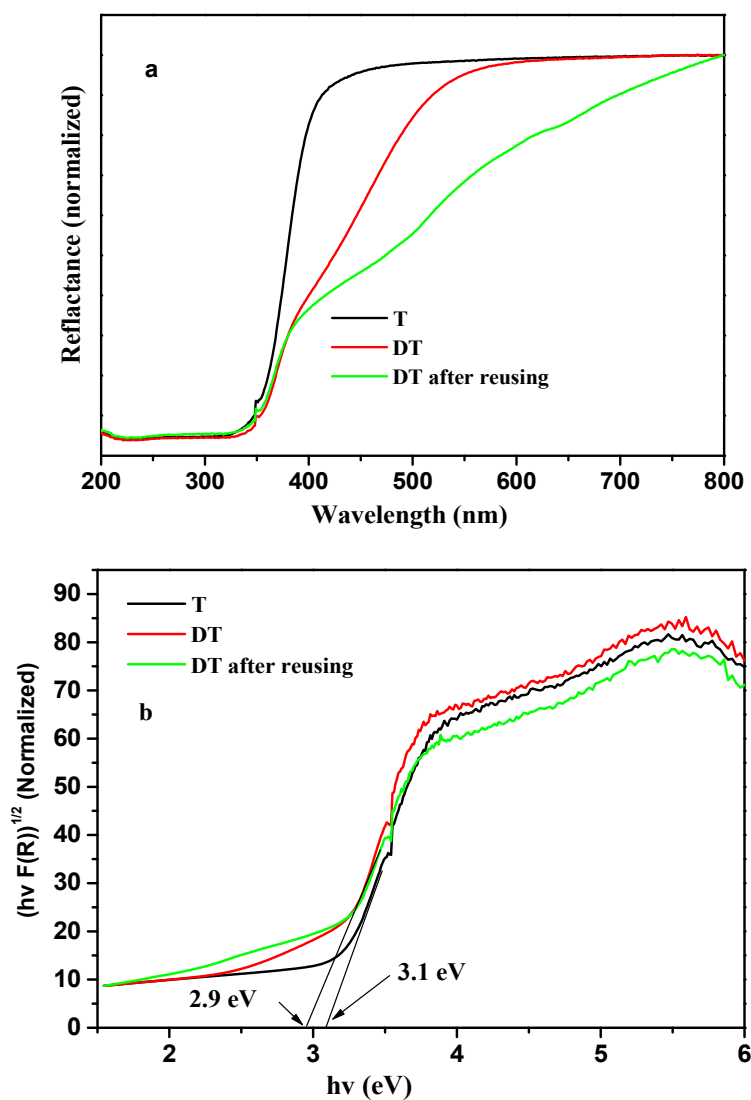

**Figure S1.** (a) UV-Vis absorption spectra (b) Tauc plots of modified Kubelka-Munk function of samples T, and DT before and after reusing.

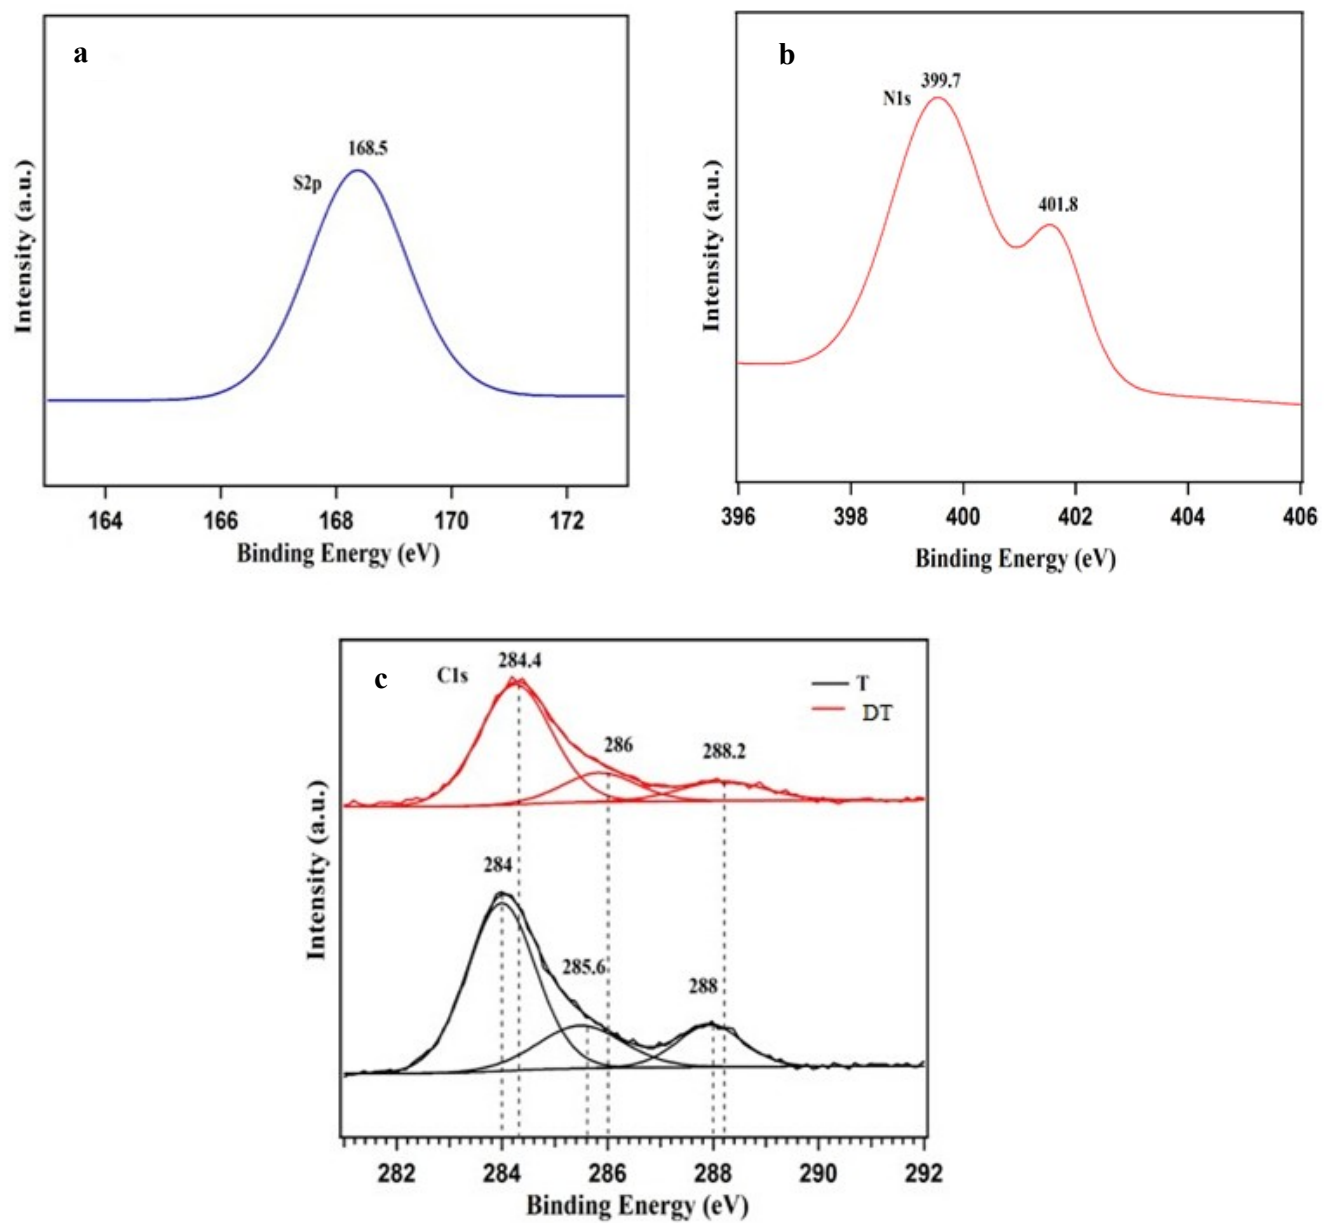

**Figure S2.** XPS detailed scans in the energy regions of (a) S2p, (b) N1s and (c) C1s for DT sample.

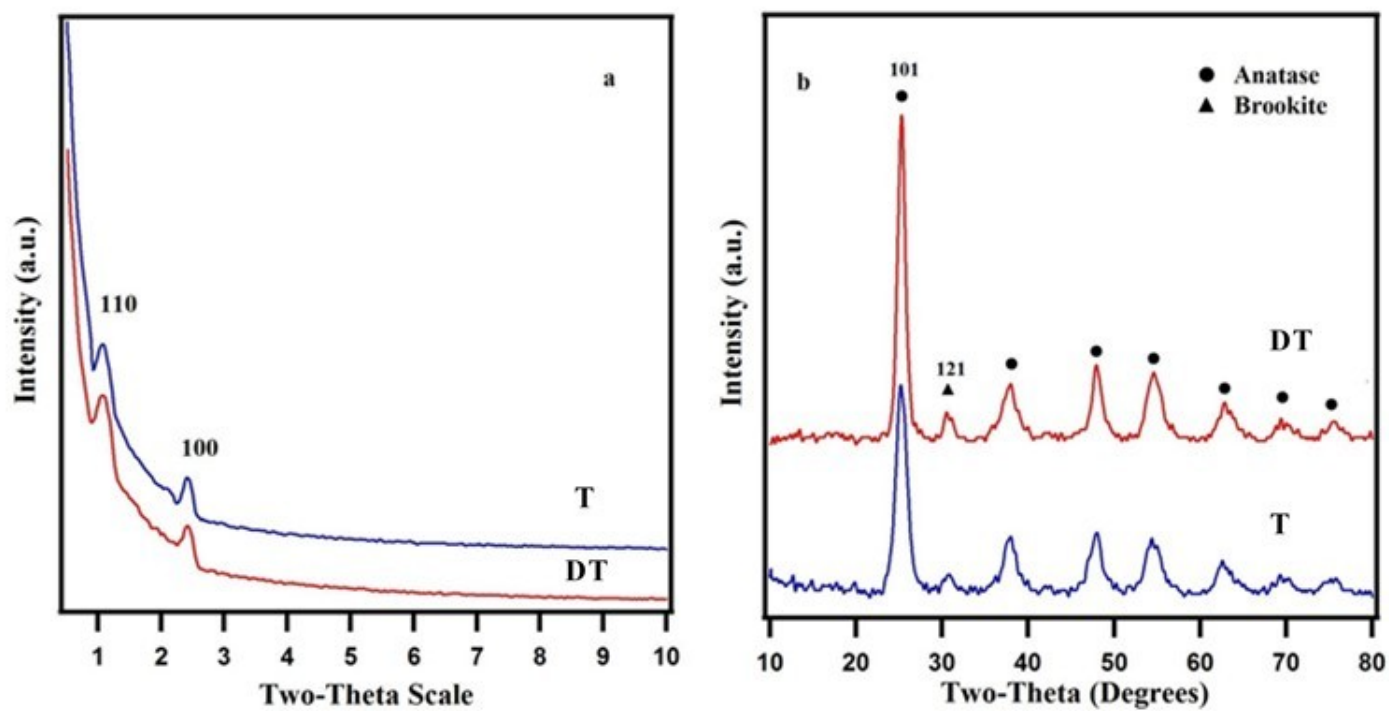

**Figure S3.** (a) Low angle XRD patterns and (b) Wide angle XRD patterns for the T and DT samples.
